# Supplementary material
Source: PubMed Central journal article supplement (PMC2197202)
Supplement: rspb20063761s05.pdf [file rspb20063761s05.pdf]

| genus                   | species               | Recent/Fossil | lifestyle | L (mm) | hd (mm) | tr (mm) | ta (mm) | references                   |
|-------------------------|-----------------------|---------------|-----------|--------|---------|---------|---------|------------------------------|
| <i>Pseudosagitta</i>    | <i>lyra</i>           | Recent        | pelagic   | 50.0   | 2.9     | 38.6    | 7.1     | Bieri 1991                   |
| <i>Serratosagitta</i>   | <i>tasmanica</i>      | Recent        | pelagic   | 14.0   | 0.9     | 9.7     | 3.2     | Bieri 1991                   |
|                         | <i>serratodentata</i> | Recent        | pelagic   | 9.1    | 0.6     | 6.4     | 2.1     | SERTC 2005                   |
| <i>Decipisagitta</i>    | <i>decipiens</i>      | Recent        | pelagic   | 20.0   | 1.4     | 13.2    | 4.9     | Pierrot-Bults & Chidgey 1988 |
| <i>Solidosagitta</i>    | <i>planctonis</i>     | Recent        | pelagic   | 35.0   | 2.7     | 23.8    | 7.3     | Bieri 1991                   |
| <i>Zonosagitta</i>      | <i>bedoti</i>         | Recent        | pelagic   | 25.0   | 1.8     | 17.7    | 5.0     | Bieri 1991                   |
| <i>Pterosagitta</i>     | <i>draco</i>          | Recent        | pelagic   | 12.0   | 1.3     | 5.7     | 4.6     | Bieri 1991                   |
| <i>Pterokrohnia</i>     | <i>arabica</i>        | Recent        | pelagic   | 20.0   | 1.5     | 13.6    | 4.9     | Bieri 1991                   |
| <i>Caecosagitta</i>     | <i>macrocephala</i>   | Recent        | pelagic   | 20.0   | 2.3     | 11.0    | 5.9     | Bieri 1991                   |
| <i>Ferosagitta</i>      | <i>robusta</i>        | Recent        | pelagic   | 20.0   | 1.1     | 13.0    | 5.0     | Bieri 1991                   |
|                         | <i>hispida</i>        | Recent        | pelagic   | 14.9   | 0.9     | 9.7     | 3.9     | SERTC 2005                   |
|                         | <i>ferox</i>          | Recent        | pelagic   | 13.0   | 0.8     | 8.3     | 2.6     | Alvariño 1967                |
| <i>Flacisagitta</i>     | <i>hexaptera</i>      | Recent        | pelagic   | 30.0   | 1.8     | 22.2    | 5.0     | Bieri 1991                   |
|                         | <i>enflata</i>        | Recent        | pelagic   | 30.0   | 1.8     | 23.5    | 5.2     | SERTC 2005                   |
|                         | <i>lyra</i>           | Recent        | pelagic   | 22.5   | 1.0     | 17.7    | 2.9     | SERTC 2005                   |
| <i>Mesosagitta</i>      | <i>minima</i>         | Recent        | pelagic   | 15.0   | 0.6     | 11.5    | 2.4     | Bieri 1991                   |
|                         | <i>sibogae</i>        | Recent        | pelagic   | 14.5   | 0.8     | 10.2    | 3.2     | SERTC 2005                   |
| <i>Parasagitta</i>      | <i>elegans</i>        | Recent        | pelagic   | 30.0   | 1.5     | 22.2    | 5.1     | Bieri 1991                   |
| <i>Bathybelos</i>       | <i>typhlos</i>        | Recent        | pelagic   | 17.0   | 1.5     | 10.8    | 4.2     | Bieri 1991                   |
| <i>Aidosagitta</i>      | <i>neglecta</i>       | Recent        | pelagic   | 9.0    | 0.4     | 5.7     | 2.2     | Bieri 1991                   |
|                         | <i>bedfordii</i>      | Recent        | pelagic   | 4.0    | 0.3     | 2.3     | 1.3     | Alvariño 1967                |
|                         | <i>regularis</i>      | Recent        | pelagic   | 9.5    | 0.6     | 5.9     | 2.7     | Alvariño 1967                |
| <i>Eukrohnia</i>        | <i>hamata</i>         | Recent        | pelagic   | 23.0   | 1.4     | 15.9    | 5.0     | Bieri 1991                   |
|                         | <i>macroneura</i>     | Recent        | pelagic   | 16.2   | 0.7     | 10.7    | 4.4     | Casanova 1986b               |
|                         | <i>flaccicoeca</i>    | Recent        | pelagic   | 14.2   | 0.9     | 9.6     | 4.5     | SERTC 2005                   |
|                         | <i>calliops</i>       | Recent        | pelagic   | 22.3   | 1.6     | 14.9    | 5.7     | SERTC 2005                   |
|                         | <i>proboscidea</i>    | Recent        | pelagic   | 28.9   | 1.9     | 19.5    | 6.9     | SERTC 2005                   |
|                         | <i>bathyantartica</i> | Recent        | pelagic   | 22.7   | 1.3     | 16.0    | 5.1     | SERTC 2005                   |
|                         | <i>bathypelagica</i>  | Recent        | pelagic   | 11.2   | 0.7     | 7.2     | 3.1     | SERTC 2005                   |
| <i>Sagitta</i>          | <i>macrocephala</i>   | Recent        | pelagic   | 18.4   | 1.8     | 10.7    | 5.9     | Casanova 1992                |
|                         | <i>siamensis</i>      | Recent        | pelagic   | 7.7    | 0.8     | 4.7     | 2.3     | Casanova & Goto 1997         |
|                         | <i>nairi</i>          | Recent        | pelagic   | 5.2    | 0.3     | 3.5     | 1.5     | Casanova & Nair 2002         |
|                         | <i>megalophtalma</i>  | Recent        | pelagic   | 18.4   | 1.2     | 11.9    | 5.0     | SERTC 2005                   |
|                         | <i>helenae</i>        | Recent        | pelagic   | 15.1   | 1.0     | 10.0    | 3.8     | SERTC 2005                   |
|                         | <i>bipunctata</i>     | Recent        | pelagic   | 9.2    | 0.7     | 6.0     | 2.3     | Bieri 1991                   |
|                         | <i>tenuis</i>         | Recent        | pelagic   | 7.3    | 0.4     | 4.8     | 1.9     | SERTC 2005                   |
|                         | <i>friderici</i>      | Recent        | pelagic   | 8.3    | 0.5     | 5.7     | 2.3     | SERTC 2005                   |
|                         | <i>decipiens</i>      | Recent        | pelagic   | 16.8   | 1.1     | 11.6    | 3.9     | Guglielmo & Ianora 1997      |
|                         | <i>gazellae</i>       | Recent        | pelagic   | 89.4   | 3.4     | 75.0    | 9.2     | Guglielmo & Ianora 1997      |
|                         | <i>maxima</i>         | Recent        | pelagic   | 92.4   | 4.7     | 69.1    | 18.5    | Guglielmo & Ianora 1997      |
| <i>Heterokrohnia</i>    | <i>mirabilis</i>      | Recent        | pelagic   | 30.0   | 3.4     | 19.1    | 8.6     | Bieri 1991                   |
|                         | <i>mirabiloides</i>   | Recent        | pelagic   | 33.0   | 2.0     | 19.1    | 6.9     | Casanova & Chidgey 1990      |
|                         | <i>wishnerae</i>      | Recent        | pelagic   | 7.6    | 0.7     | 3.8     | 3.0     | Casanova 1992                |
|                         | <i>alvinae</i>        | Recent        | pelagic   | 7.5    | 0.6     | 4.3     | 2.6     | Casanova, 1992               |
|                         | <i>heterodonta</i>    | Recent        | pelagic   | 25.6   | 3.0     | 12.2    | 9.1     | Casanova 1991a               |
|                         | <i>angeli</i>         | Recent        | pelagic   | 6.0    | 0.9     | 3.6     | 3.2     | Casanova 1994                |
|                         | <i>discoveryi</i>     | Recent        | pelagic   | 7.1    | 0.8     | 3.4     | 2.5     | Casanova 1994                |
|                         | <i>biscayensis</i>    | Recent        | pelagic   | 12.4   | 1.5     | 7.4     | 5.0     | Casanova 1994                |
|                         | <i>furnestinae</i>    | Recent        | pelagic   | 24.0   | 2.2     | 14.2    | 9.8     | Casanova & Chidgey 1987      |
| <i>Archeterokrohnia</i> | <i>rubra</i>          | Recent        | pelagic   | 13.0   | 1.8     | 4.6     | 6.3     | Casanova 1986a               |
|                         | <i>rubra</i>          | Recent        | pelagic   | 25.2   | 3.9     | 10.0    | 12.2    | Casanova 1986a               |
| <i>Xenokrohnia</i>      | <i>sorbei</i>         | Recent        | pelagic   | 7.7    | 0.7     | 3.5     | 3.8     | Casanova 1993b               |
| <i>Krohmitella</i>      | <i>boueei</i>         | Recent        | benthic   | 7.0    | 0.8     | 3.5     | 2.0     | Bieri 1991                   |
| <i>Krohmita</i>         | <i>subtilis</i>       | Recent        | benthic   | 13.0   | 0.6     | 7.8     | 4.3     | Bieri 1991                   |
|                         | <i>pacifica</i>       | Recent        | benthic   | 6.7    | 0.4     | 4.3     | 1.9     | SERTC 2005                   |
| <i>Spadella</i>         | <i>cephaloptera</i>   | Recent        | benthic   | 8.0    | 1.0     | 2.4     | 3.8     | Bieri 1991                   |
|                         | <i>antarctica</i>     | Recent        | benthic   | 5.9    | 0.6     | 2.4     | 3.1     | Casanova 1991b               |
|                         | <i>boucheri</i>       | Recent        | benthic   | 1.3    | 0.1     | 0.5     | 0.6     | Casanova & Perez 2000        |
|                         | <i>japonica</i>       | Recent        | benthic   | 3.8    | 0.4     | 1.5     | 1.8     | Casanova 1993a               |
|                         | <i>pulchella</i>      | Recent        | benthic   | 2.6    | 0.3     | 0.8     | 1.3     | SERTC 2005                   |
| <i>Paraspadella</i>     | <i>schizoptera</i>    | Recent        | benthic   | 8.0    | 1.0     | 2.6     | 3.4     | Bieri 1991                   |
|                         | <i>gotoi</i>          | Recent        | benthic   | 5.9    | 0.8     | 2.2     | 2.4     | Casanova 1990                |
|                         | <i>nana</i>           | Recent        | benthic   | 2.4    | 0.3     | 0.7     | 1.2     | Alvariño 1967                |
| <i>Bathyspadella</i>    | <i>edentata</i>       | Recent        | benthic   | 12.0   | 1.2     | 4.9     | 5.4     | Bieri 1991                   |
| <i>Hemispadella</i>     | <i>dauvini</i>        | Recent        | benthic   | 18.5   | 1.9     | 7.0     | 10.3    | Casanova 1996                |
| <i>Protosagitta</i>     | <i>spinosa</i>        | Fossil        |           | 33.1   | 3.5     | 19.5    | 9.4     | this paper                   |
| <i>Eognathacanta</i>    | <i>ercainella</i>     | Fossil        |           | 36.9   | 3.6     | 22.0    | 10.4    | Chen & Huang 2002            |

- Alvariño, A. 1967 The Chaetognatha of the NAGA Expedition (1959-1961) in the South China Sea and the Gulf of Thailand, Part 1: Systematics. *NAGA Reports* **4**, 1-197.
- Bieri, R. 1991 Systematics of the Chaetognatha. In *The biology of chaetognaths* (ed. Q. Bone, H. Kapp & A. C. Pierrot-Bults), pp. 32–44. Oxford, UK: Oxford University Press.
- Casanova, J.-P. 1986a *Archeterokrohnia rubra* n. gen., n. sp., nouveau chaetognathe abyssal de l'Atlantique nord-africain: description et position systématique, hypothèses phylogénétiques. *Bull. Mus. Nat. Hist. Nat. Paris* **8**, 185-194.
- Casanova, J.-P. 1986b Deux nouvelles espèces d'*Eukrohnia* (Chaetognatha) de l'Atlantique sud-tropical africain. *Bull. Mus. Nat. Hist. Nat. Paris* **8**, 819-833.
- Casanova, J.-P. 1990 A new species of *Paraspadella* (Chaetognatha) from the coastal waters of Japan. *Proc. Biol. Soc. Washington* **103**, 907-912.
- Casanova, J.-P. 1991a Chaetognaths from the Alvin dives on the Seamount Volcano 7 (East tropical Pacific). *J. Plankton Res.* **13**, 539-548.
- Casanova, J.-P. 1991b The first record of a benthic polar chaetognath: a new *Spadella* from the Antarctic. *J. Nat. Hist.* **25**, 1355–1362. (doi:10.1080/00222939100770841)
- Casanova, J.-P. 1992 Chaetognaths from Alvin dives in the Santa Catalina Basin (California), with description of two new *Heterokrohnia* species. *J. Nat. Hist.* **26**, 663–674. (doi:10.1080/00222939200770411)
- Casanova, J.-P. 1993a *Spadella japonica*, a new coastal benthic chaetognath from Japan. *Proc. Biol. Soc. Washington* **106**, 359-365.
- Casanova, J.-P. 1993b A new genus and species of deep-sea chaetognath from the Bay of Biscay with a strange ventral secretory gland. *J. Nat. Hist.* **27**, 445-455.
- Casanova, J.-P. 1994 Three new rare *Heterokrohnia* species (Chaetognatha) from deep benthic samples in the northeast Atlantic. *Proc. Biol. Soc. Washington* **107**, 743-750.
- Casanova, J.-P. 1996 A new genus and species of deep-benthic chaetognath from the Atlantic: a probable link between the families Heterokrohniidae and Spadellidae. *J. Nat. Hist.* **30**, 1239-1245.
- Casanova, J.-P. 2002 A new species of *Sagitta* (Chaetognatha) from the Laccadive lagoon (Indian Ocean) having fan-shaped anterior teeth: phylogenetical implications. *J. Nat. Hist.* **36**, 149–156. (doi:10.1080/00222930010009345)
- Casanova, J.-P. & Chidgey, K. 1987 Une nouvelle espèce d'*Heterokrohnia* (Chaetognathe) des campagnes du "Discovery" dans l'Atlantique nord-oriental. *Bull. Mus. Nat. Hist. Nat. Paris* **9**, 879-885.
- Casanova, J.-P. & Chidgey, K. 1990 A new benthopelagic species of *Heterokrohnia* (Chaetognatha) from the North Atlantic Ocean. *Bull. Zool. Mus.* **12**, 109-116.
- Casanova, J.-P. & Goto, T. 1997 *Sagitta siamensis*, a new benthoplanktonic Chaetognatha living in marine meadows of the Andaman Sea, Thailand. *Cah. Biol. Mar.* **38**, 51-58.
- Casanova, J.-P. & Perez, Y. 2000. A dwarf *Spadella* (Chaetognatha) from the Bora Bay (Miyako Island, Japan). *Cah. Biol. Mar.* **41**, 137-141.
- Guglielmo, L. & Ianora, A. 1997 Chaetognaths. In *Atlas of Marine Zooplankton/Straits of Magellan/Amphipods, Euphausiids, Mysids, Ostracods, and Chaetognaths* (ed. L. Guglielmo & A. Ianora), pp. 244–275. Berlin, Germany: Springer.
- Pierrot-Bults, A. C. & Chidgey, K. C. 1988 Chaetognatha: keys and notes for the identification of the species. *Syn. Br. fauna (new series)* **39**, 1–66.
- SERTC-South Regional Taxonomic Center (SERTC) 2005 *Interactive key to the species of Chaetognatha from the South Atlantic Bight and northern Gulf of Mexico*. <http://www.dnr.sc.gov/marine/sertc/info.htm>.
