# Supplementary material
Source: PubMed Central journal article supplement (PMC2197202)
Supplement: rspb20063761s07.pdf [file rspb20063761s07.pdf]

| Species                                                        | clusters               | max. L (mm)    | stratigraphy                 | age                   | locality                          | references                        |
|----------------------------------------------------------------|------------------------|----------------|------------------------------|-----------------------|-----------------------------------|-----------------------------------|
| <i>Mongolodus longispinus</i> (Yang & He, 1984)                | <b>HA(5)</b>           | <b>1.3</b>     | <b>Kuanchuanpu Formation</b> | <b>basal Cambrian</b> | <b>S. China (S Shaanxi Prov.)</b> | <b>this paper</b>                 |
|                                                                | HA(2-4)                | 0.5            | Tal Formation                | basal Cambrian        | India (Lesser Himalaya)           | Azmi 1996                         |
| <i>Mongolodus platybasalis</i> (Yang & He, 1984)               | HA(4)                  | 1.0            | Tal Formation                | basal Cambrian        | India (Lesser Himalaya)           | Azmi 1996                         |
| <i>Phakelodus tenuis</i> (Müller, 1959)                        | AP (uncertain nb.)     | 1.6            | subsurface                   | Furongian             | Northern Poland                   | Szaniawski 1980, 1982, 1983, 2002 |
|                                                                | AP (17)                | 0.7            | several sections             | Furongian             | Sweden (Kinnekule, Öland)         | Müller & Hinz 1991                |
|                                                                | AP (12-15)             | 3.5            | no detailed info.            | Furongian             | Sweden (Hunneberg, Västergötland) | Müller & Andres 1976, Andres 1988 |
|                                                                | AP (>10)               | 5.5            | Cwmhesgen Formation          | Furongian             | North Wales                       | Bergström & Orchard 1985          |
|                                                                | AP (8 to 12 poss. 16)  | ?              | no detailed info.            | Furongian             | UK, Warwickshire                  | Miller & Rushton 1973             |
|                                                                | AP (20)                | 4.4            | Robertson Bay Group          | uppermost Cam./Trem.  | Antarctica (North Victoria Land)  | Buggisch & Repetski 1987          |
|                                                                | HA(2-12)               | 1.3            | no detailed info.            | Furongian             | Kazakhstan                        | Abaimova 1980                     |
|                                                                | HA(4-5)                | 0.4-1.2        | Huaqiao Fm                   | M. Cambrian           | Chine (Hunan)                     | Dong & Bergström 2001             |
| ? <i>Phakelodus tenuis</i> (Müller, 1959) (*1)                 | HA (4-9 or more)       | 1.2            | Germantown Formation         | L. Cambrian           | USA (Columbia County, New York)   | Landing 1977                      |
| <i>Phakelodus elongatus</i> (Zhang in An <i>et al.</i> , 1983) | AP (26)                | 0.7            | several sections             | Furongian             | Sweden (Kinnekule, Öland)         | Müller and Hinz 1991              |
| <i>Phakelodus savitzkyi</i> (Abaimova, 1978)                   | HA(6)                  | ca. 0.9        | subsurface                   | Furongian             | Northern Poland                   | Szaniawski 2002                   |
| <i>Phakelodus</i> sp.                                          | AP (ca.18)             | 4.2            | no detailed info.            | Furongian             | Sweden (Hunneberg, Västergötland) | Andres 1981                       |
| <i>Protohertzina anabarica</i> Missarzhevsky, 1973             | HA (2)                 | ca. 1.0        | Tal Formation                | basal Cambrian        | India (Lesser Himalaya)           | Azmi & Paul 2004                  |
| <b><i>Protohertzina unguiformis</i> Missarzhevsky, 1973</b>    | <b>HA (2)</b>          | <b>1.7</b>     | <b>Kuanchuanpu Formation</b> | <b>basal Cambrian</b> | <b>S. China (S Shaanxi Prov.)</b> | <b>this paper</b>                 |
| <i>Prototohertzina? canadia</i> McIlroy & Szaniawski, 2000     | HA (3)                 | 4.2            | Chapel Island Formation      | L. Cambrian           | Canada (SE Newfoundland)          | McIlroy & Szaniawski 2000         |
| protoconodont indet.                                           | HA (2)                 | 1.9            | Soltanieh Formation          | L. Cambrian           | Iran (Central Alborz)             | Hamdi 1989                        |
| protoconodont indet.                                           | AP (uncertain nb.)     | 0.6            | no detailed info.            | L. Tremadoc           | Sweden (Öland)                    | Szaniawski 2002                   |
| <i>Protosagitta spinosa</i> Hu in Chen <i>et al.</i> , 2002    | <b>AP (16 or more)</b> | <b>ca. 1.2</b> | <b>Yu'anshan Formation</b>   | <b>L. Cambrian</b>    | <b>South China (Yunnan)</b>       | <b>this paper</b>                 |

- Abaimova, G. P. 1980 Apparatuses of Cambrian conodonts from Kazakhstan. *Paleontologicheskij Zhurnal* **2**, 143-146.
- Andres, D. 1981 Beziehungen zwischen kambrischen Conodonten und Euconodonten. *Berliner Geowissenschaftliche Abhandlungen A* **32**, 19-31.
- Bergström, S. M. & Orchard, M. J. 1985 Conodonts of the Cambrian and Ordovician Systems from the British Isles. In *A stratigraphical index of conodonts* (ed. A. C. Higgins & R. L. Austin).
- Buggisch, W. & Repetski, J. E. 1987 Uppermost Cambrian (?) and Tremadocian conodonts from Handler Ridge, Robertson Bay Terrane, North Victoria Land, Antarctica. *Geologisches Jahrbuch B* **66**, 145-185.
- Hamdi, B. 1989 Stratigraphy and Palaeontology of the late Precambrian to Early Cambrian in the Alborz Mountains, Northern Iran. *Geol. Survey Iran* **59**, 1-41.
- Landing, E. 1977 "*Prooneotodus*" *tenuis* (Müller, 1959) apparatuses from the taconic allochthon, Eastern New York: Construction, taphonomy and the protoconodont "supertooth" model. *J. Paleontol.* **51**, 1072-1084.
- McIlroy, D. & Szaniawski, H. 2000 A Lower Cambrian protoconodont apparatus from the Placentian of southeastern Newfoundland. *Lethaia* **33**, 95-102.  
(doi:10.1080/00241160050150230)
- Miller, J. F. & Rushton, A. W. A. 1973 Natural conodont assemblages from the Upper Cambrian of Warwickshire. *Geol. Soc. Am., Abstr. Progr.* **5**, 337-338.
- Missarzhevsky, V. V. 1973 Stratigraphy and Fauna of the Precambrian-Cambrian boundary beds of the Siberian Platform and Kazakhstan. *Trudy Inst. Geol. Geofiz. Sib. Otd.* **49**, 1-53.
- Yang, X. & He, T. 1984 New Small Shelly Fossils from Lower Cambrian Meishucun Stage of Nanjiang Area, northern Sichuan. *Prof. Papers in Stratigr. Palaeontol.* **13**, 35-47.
